# Supplementary material
Source: PubMed Central journal article supplement (PMC5467140)
Supplement: Supp_Appendix1.pdf [file Supp_Appendix1.pdf]

## Supplementary Data

### APPENDIX 1. MEMBERS OF THE CANINE SPINAL CORD INJURY CONSORTIUM (CANSORT-SCI)

| <i>Name</i>             | <i>Area of expertise</i>                                                | <i>Affiliation</i>                           |
|-------------------------|-------------------------------------------------------------------------|----------------------------------------------|
| Michele Basso           | Laboratory spinal cord injury, human spinal cord injury clinical trials | The Ohio State University, USA               |
| Andrew Blight           | Laboratory spinal cord injury                                           | Acorda Therapeutics                          |
| Ronaldo da Costa        | Veterinary clinical spinal cord injury                                  | The Ohio State University, USA               |
| Nicolas Granger         | Veterinary clinical spinal cord injury, laboratory spinal cord injury   | University of Bristol, UK                    |
| Robert Grossman         | Human spinal cord injury clinical trials                                | Houston Methodist Hospital, USA              |
| Nick Jeffery            | Veterinary clinical spinal cord injury, laboratory spinal cord injury   | Texas A&M University, USA                    |
| Jonathan Levine         | Veterinary clinical spinal cord injury                                  | Texas A&M University, USA                    |
| Sarah Moore             | Veterinary clinical spinal cord injury                                  | The Ohio State University, USA               |
| Linda Noble- Haeusslein | Laboratory spinal cord injury                                           | University of California, San Francisco, USA |
| Yvette Nout-Lomas       | Veterinary clinical spinal cord injury, laboratory spinal cord injury   | Colorado State University, USA               |
| Natasha Olby            | Veterinary clinical spinal cord injury, laboratory spinal cord injury   | North Carolina State University              |
| Veronika Stein          | Veterinary clinical spinal cord injury                                  | University of Berne, Switzerland             |
| Ingo Spitzbarth         | Veterinary neuropathology                                               | University of Hannover, Germany              |
| Andrea Tipold           | Veterinary clinical spinal cord injury                                  | University of Hannover, Germany              |
