# Supplementary material
Source: PubMed Central journal article supplement (PMC5467140)
Supplement: Supp_Appendix2.pdf [file Supp_Appendix2.pdf]

APPENDIX 2. SUMMARY OF SERUM AND CEREBROSPINAL FLUID BIOMARKERS IN CANINE SPINAL CORD INJURY

| <i>Biomarker</i>                                                                | <i>Tissue</i> | <i>Type</i>         | <i>Elevated in SCI</i> | <i>Correlated to SCI severity</i> | <i>Correlated to motor outcome</i> | <i>Publication</i>                        | <i>Biomarker</i>                                                                |
|---------------------------------------------------------------------------------|---------------|---------------------|------------------------|-----------------------------------|------------------------------------|-------------------------------------------|---------------------------------------------------------------------------------|
| Phosphorylated neurofilament                                                    | Serum         | Structural          | Yes                    | Yes                               | Yes                                | Nishida Vet Surg 2014                     | Phosphorylated neurofilament                                                    |
| Tau                                                                             | CSF           | Structural          | Yes                    | Yes                               | Yes                                | Roerig Vet J 2013                         | Tau                                                                             |
| S100B                                                                           | CSF           | Structural          | Yes                    | N/A                               | N/A                                | Hayashi J Vet Med 2013                    | S100B                                                                           |
| Myelin basic protein                                                            | CSF           | Structural          | Yes                    | No                                | Yes                                | Levine JVIM 2010                          | Myelin basic protein                                                            |
| C-reactive protein                                                              | CSF           | Acute phase protein | No                     | Yes                               | No                                 | Anderson JNT 2015                         | C-reactive protein                                                              |
| Haptoglobin                                                                     | CSF           | Acute phase protein | Yes                    | Yes                               | No                                 | Anderson JNT 2015                         | Haptoglobin                                                                     |
| Serum amyloid A                                                                 | CSF           | Acute phase protein | No                     | No                                | No                                 | Anderson JNT 2015                         | Serum amyloid A                                                                 |
| $\alpha$ -glycoprotein                                                          | CSF           | Acute phase protein | No                     | No                                | No                                 | Anderson JNT 2015                         | $\alpha$ -glycoprotein                                                          |
| Glutamate                                                                       | CSF           | Neurotransmitter    | Yes                    | Yes                               | N/A                                | Olby JNT 1999                             | Glutamate                                                                       |
| Interleukin (IL) - 8                                                            | CSF           | Cytokine            | Yes                    | No                                | No                                 | Taylor JNT 2014                           | Interleukin (IL) - 8                                                            |
| Monocyte chemotactic protein-1                                                  | CSF           | Cytokine            | No                     | No                                | Yes                                | Taylor JNT 2014                           | Monocyte chemotactic protein-1                                                  |
| IL-2, -6, -7, -10, -15, -18 tumor necrosis factor- $\alpha$ interferon $\gamma$ | CSF           | Cytokines           | No                     | No                                | No                                 | Taylor JNT 2014                           | IL-2, -6, -7, -10, -15, -18 tumor necrosis factor- $\alpha$ interferon $\gamma$ |
| CCL19                                                                           | CSF           | Cytokine            | Yes                    | N/A                               | N/A                                | Bartels BMC Vet Res 2014                  | CCL19                                                                           |
| MMP-9                                                                           | CSF           | Enzyme              | Yes                    | Yes                               | N/A                                | Nagano Res Vet Sci 2011; Levine AJVR 2006 | MMP-9                                                                           |
| MMP-9                                                                           | Serum         | Enzyme              | Yes                    | N/A                               | N/A                                | Levine AJVR 2006                          | MMP-9                                                                           |
| MMP-2/MMP-9                                                                     | Serum         | Enzyme              | Yes                    | N/A                               | N/A                                | Levine PLOS ONE 2014                      | MMP-2/MMP-9                                                                     |
| CK                                                                              | CSF           | Enzyme              | Yes                    | Yes                               | Yes                                | Witsberger JAVMA 2012                     | CK                                                                              |
| Lactate                                                                         | CSF           | Acid                | No                     | No                                | No                                 | Witsberger JAVMA 2012                     | Lactate                                                                         |

(continued)

APPENDIX 2. (CONTINUED)

| <i>Biomarker</i>           | <i>Tissue</i> | <i>Type</i> | <i>Elevated in SCI</i> | <i>Correlated to SCI severity</i> | <i>Correlated to motor outcome</i> | <i>Publication</i>                                                             | <i>Biomarker</i>           |
|----------------------------|---------------|-------------|------------------------|-----------------------------------|------------------------------------|--------------------------------------------------------------------------------|----------------------------|
| Total nucleated cell count | CSF           | Cell        | N/A                    | Yes                               | Yes                                | Windsor JVIM 2008, Levine VCP 2014, Chamisha Res Vet Sci 2015, Srugo JVIM 2011 | Total nucleated cell count |
| Macrophages                | CSF           | Cell        | N/A                    | Varies between studies            | Varies between studies             | Windsor JVIM 2008, Levine VCP 2014, Chamisha Res Vet Sci 2015, Srugo JVIM 2011 | Macrophages                |
| Red blood cell count       | CSF           | Cell        | N/A                    | Varies between studies            | Yes                                | Windsor JVIM 2008, Levine VCP 2014, Chamisha Res Vet Sci 2015                  | Red blood cell count       |
| Percent neutrophils        | CSF           | Cell        | N/A                    | Varies between studies            | Yes                                | Windsor JVIM 2008, Levine VCP 2014, Chamisha Res Vet Sci 2015                  | Percent neutrophils        |
| Protein concentration      | CSF           | Protein     | N/A                    | Varies between studies            | Yes                                | Windsor JVIM 2008, Levine VCP 2014, Chamisha Res Vet Sci 2015                  | Protein concentration      |

SCI, spinal cord injury; CSF, cerebrospinal fluid.
